# Supplementary material for: Direct targets of MEF2C are enriched for genes associated with schizophrenia and cognitive function and are involved in neuron development and mitochondrial function
Source: PLoS Genet. 2024 Sep 11;20(9):e1011093. doi: 10.1371/journal.pgen.1011093 (PMC11419381; doi:10.1371/journal.pgen.1011093)
Supplement: S27 Table — (XLSX) [file pgen.1011093.s028.xlsx]

## Sheet: Sheet1
EA-SNPs	IQ-SNPs	SCZ -SNPs
rs454345	rs6893807	rs72775522
rs35991856	rs3850651
rs214136
rs35788185
rs700592
rs992623
rs72773815
